# Supplementary material for: mRNA Encoding a Bispecific Single Domain Antibody Construct Protects against Influenza A Virus Infection in Mice
Source: PubMed Central journal article supplement — Mol Ther Nucleic Acids. 2020 May 1;20:777–87. doi: 10.1016/j.omtn.2020.04.015 (PMC7240188; doi:10.1016/j.omtn.2020.04.015), 2020-05-01
Supplement: mmc1.pdf [file mmc1.pdf]

**OMTN, Volume 20**

**Supplemental Information**

**mRNA Encoding a Bispecific Single  
Domain Antibody Construct Protects  
against Influenza A Virus Infection in Mice**

**Lien Van Hoecke, Rein Verbeke, Dorien De Vlieger, Heleen Dewitte, Kenny Roose, Sharon Van Nevel, Olga Krysko, Claus Bachert, Bert Schepens, Ine Lentacker, and Xavier Saelens**

## Supplementary information

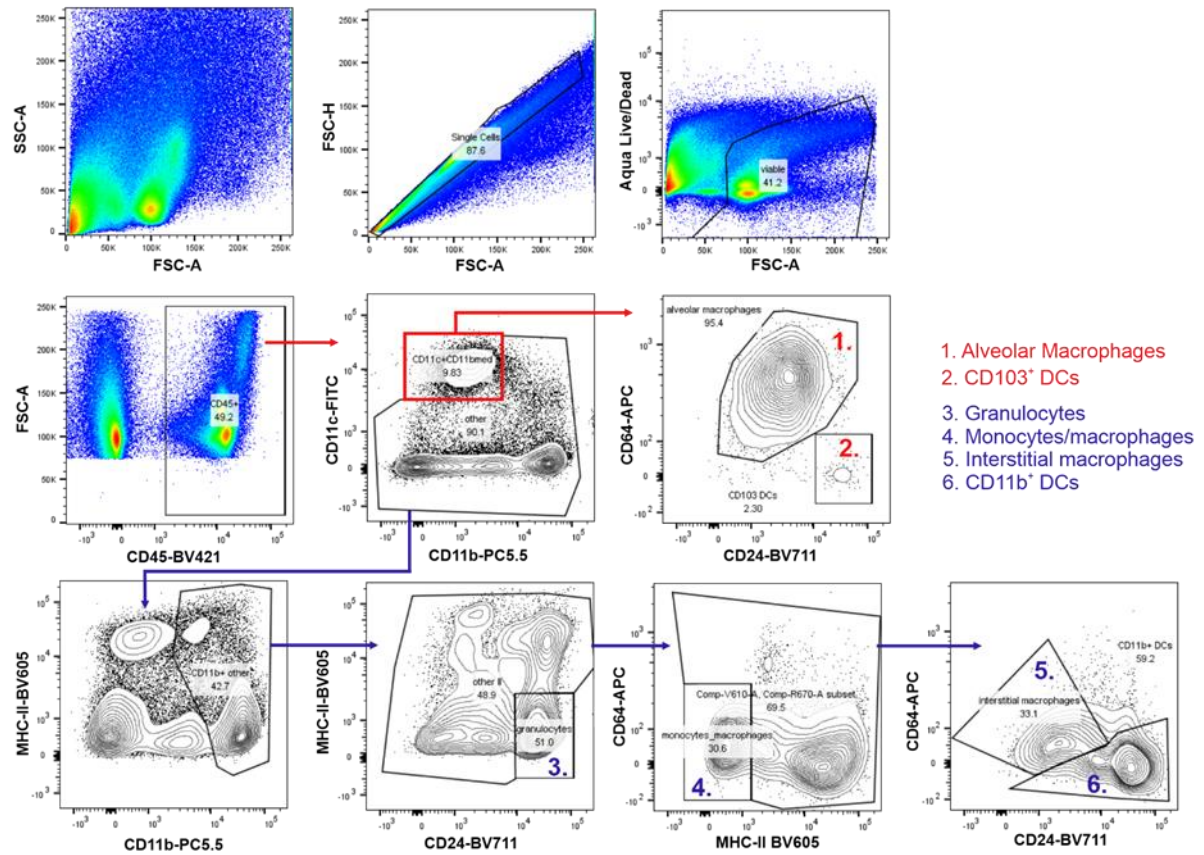

**Figure S1.** Gating strategy for flow cytometric analysis of the nanoparticle uptake (DiR signal) and mCherry mRNA expression in pulmonary innate immune cells after intratracheal instillation of DOTAP/cholesterol nanoparticles containing 5  $\mu$ g mCherry mRNA and fluorescent DiR dye. The gating strategy was based on a report from Knight *et al*<sup>27</sup>. Cells were selected on singlets (FSC-A, FSC-H) and viability (Aqua Live/Dead stain). Within the immune cell population (CD45-BV421), cell subsets were subsequently identified based on the surface markers: CD11c-FITC, CD11b-PC5.5., CD64-APC, CD24-BV711 and MHC-II-BV605. In each cell subset, uptake of nanoparticles (DiR-APC750) and mCherry mRNA expression (mCherry-Y610) were evaluated.

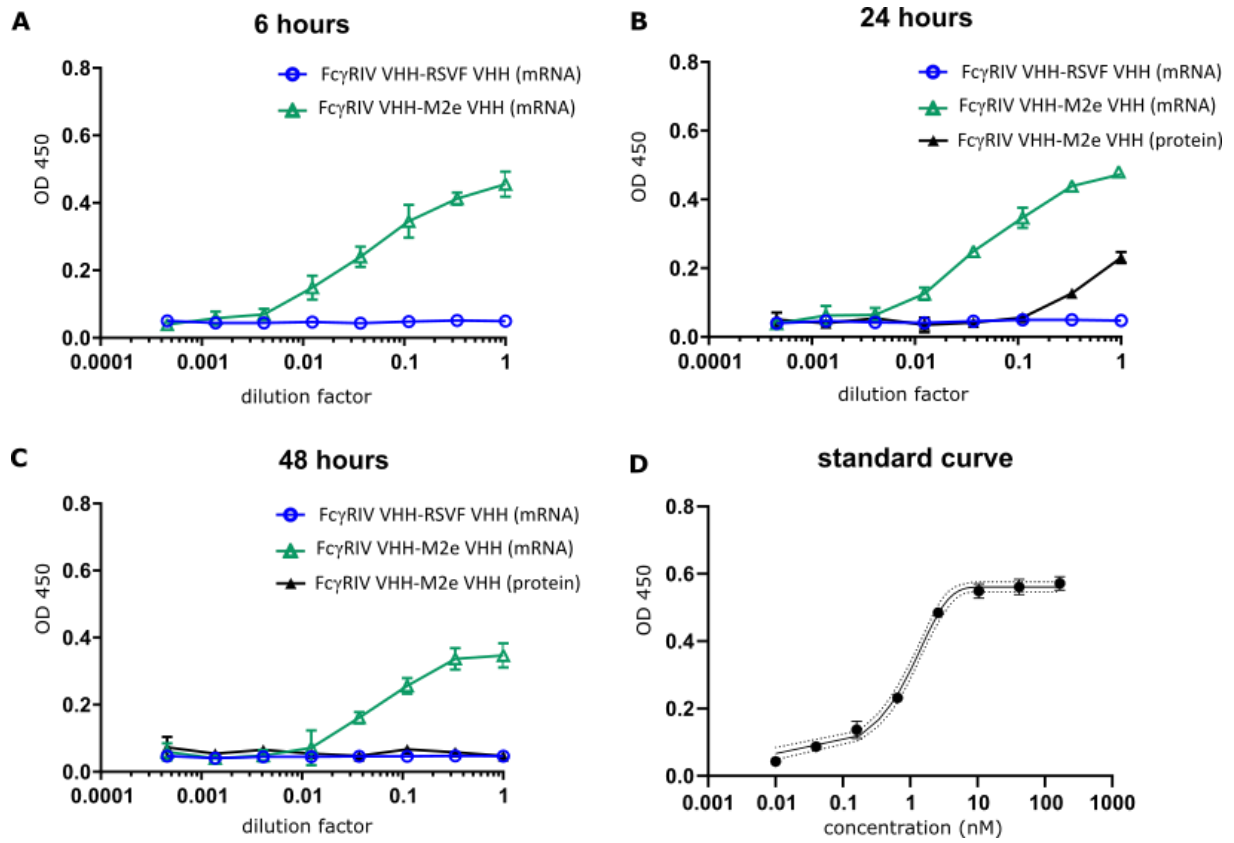

**Figure S2. A, B and C.** Five  $\mu\text{g}$  of Fc $\gamma$ RIV VHH-M2e VHH or Fc $\gamma$ RIV VHH-RSVF VHH (irrelevant mRNA) formulated in DOTAP/cholesterol particles or 50  $\mu\text{g}$  Fc $\gamma$ RIV VHH-M2e VHH protein was instilled i.t. in BALB/c mice. Six, 24 or 48 hours after instillation, BALF was isolated and cells were removed from the BALF and the ability of His<sub>6</sub>-tagged proteins to bind to M2e was investigated in a peptide ELISA. **D.** Standard curve of binding between M2e and the M2e VHH. This standard curve was used to calculate absolute concentration of the M2e VHH in the BALF.
